# **Histone gene replacement reveals a post-transcriptional role for H3K36 in maintaining metazoan transcriptome fidelity**

Michael P. Meers<sup>1,2</sup>, Telmo Henriques<sup>7#</sup>, Christopher A. Lavender<sup>8</sup>,  
Daniel J. McKay<sup>1,2,5,6</sup>, Brian D. Strahl<sup>3,4</sup>, Robert J. Duronio<sup>1,2,4,5,6</sup>, Karen Adelman<sup>7#</sup>  
and A. Gregory Matera<sup>1,2,4,5,6\*</sup>

<sup>1</sup>Curriculum in Genetics and Molecular Biology

<sup>2</sup>Integrative Program for Biological and Genome Sciences

<sup>3</sup>Department of Biochemistry and Biophysics

<sup>4</sup>Lineberger Comprehensive Cancer Center

<sup>5</sup>Department of Genetics, <sup>6</sup>Department of Biology,

The University of North Carolina at Chapel Hill, Chapel Hill, NC, 27599

<sup>7</sup>Epigenetics and Stem Cell Biology Laboratory

<sup>8</sup>Integrative Bioinformatics Support Group, National Institute of Environmental  
Health Science, Research Triangle Park, NC 27709. USA.

#Current address: Dept. of Biological Chemistry and Molecular Pharmacology,  
Harvard Medical School, 45 Shattuck Street, Boston, MA 02115

\*To whom correspondence should be addressed:

A. Gregory Matera

Integrative Program for Biological and Genome Sciences

Campus Box 7100

University of North Carolina

Chapel Hill, NC 27599

Voice: (919) 962-4567

FAX: (919) 962-4574

## Abstract

Histone H3 lysine 36 methylation (H3K36me) is thought to participate in a host of co-transcriptional regulatory events. To study the function of this residue independent from the enzymes that modify it, we used a “histone replacement” system in *Drosophila* to generate a non-modifiable H3K36 lysine-to-arginine (H3K36R) mutant. We observed global dysregulation of mRNA levels in H3K36R animals that correlates with the incidence of H3K36me<sub>3</sub>. Similar to previous studies, we found that mutation of H3K36 also resulted in H4 hyperacetylation. However, neither cryptic transcription initiation, nor alternative pre-mRNA splicing, contributed to the observed changes in expression, in contrast with previously reported roles for H3K36me. Interestingly, knockdown of the RNA surveillance nuclease, Xrn1, and members of the CCR4-Not deadenylase complex, restored mRNA levels for a class of downregulated, H3K36me<sub>3</sub>-rich genes. We propose a post-transcriptional role for modification of replication-dependent H3K36 in the control of metazoan gene expression.

## Impact Statement

Post-translational modification of histone H3K36 is neither required to suppress cryptic transcription initiation nor to include alternative exons in *Drosophila*; instead it promotes expression of active genes by stimulating polyadenylation.

## Introduction

Eukaryotic genomes function within the context of chromatin fibers composed of nucleosome units, each of which contains roughly 147 bp of DNA wrapped around a single histone octamer composed of two pairs of heterodimers (histone H2A-H2B, and H3-H4) (Luger et al., 1997). Histones are decorated with an array of covalent post-translational modifications (PTMs) that have been proposed to demarcate distinct chromatin domains in the genome (Kharchenko et al., 2011; Rice et al., 2003; Schneider et al., 2004; Sullivan and Karpen, 2004). The “histone code” hypothesis posits that PTMs play crucial roles in controlling gene expression by adapting the local chromatin packaging environment and recruiting structural or catalytic binding partners to confer or deny access to transcriptional machinery (Bannister and Kouzarides, 2011; Jenuwein and Allis, 2001; Rothbart and Strahl, 2014; Strahl and Allis, 2000; Taverna et al., 2007). Partly on the basis of this model, PTMs have been considered strong candidates for primary carriers of epigenetic information that contribute to cell fate specification during development (Margueron and Reinberg, 2010). This concept has been extended to suggest PTM dysregulation as a likely contributor to diseases characterized by altered gene expression and cell identity (Chi et al., 2010; Lewis et al., 2013).

In multicellular eukaryotes, support for the histone code hypothesis is largely based on phenotypes observed from studies in which the “writer” enzymes responsible for catalyzing histone PTMs were inhibited or ablated. However, such experiments cannot rule out the possibility that these enzymes have other non-histone substrates, or play other non-catalytic (e.g., structural) roles, that confound analysis and assignment of observed phenotypes to the PTMs themselves. Several recent studies have employed a direct replacement of the endogenous, replication-dependent histone gene cluster in *Drosophila melanogaster* with transgenic clusters encoding non-modifiable mutant histones (Günesdogan et al., 2010; Hödl and Basler, 2012; Pengelly et al., 2013; McKay et al., 2015; Graves et al., 2016; Penke et al., 2016). This approach has enabled the deconvolution of phenotypes specific to histone PTMs from those specific to their writers. These studies have elucidated the relationship between PTMs and their writers, both confirming (Pengelly et al., 2013)

and refuting (McKay et al., 2015) previously reported roles for certain residues on the basis of their corresponding writer mutant phenotypes. The approach also affords an opportunity to directly interrogate the function of other well-characterized histone PTMs for which a variety of functional roles have been described.

In contrast with many PTMs whose spatial distribution is skewed towards promoters and the 5' regions of genes, H3K36 di- and tri-methylation (H3K36me<sub>2/3</sub>) are enriched in coding regions and toward the 3' end of actively transcribed genes (Bannister et al., 2005). These marks are also preferentially enriched over exons as opposed to introns (Kolasinska-Zwierz et al., 2009). This distribution pattern suggests that H3K36me interfaces with RNA polymerase and contributes to transcription elongation and/or RNA processing, rather than affecting gene expression via chromatin packaging at promoters. Indeed, H3K36me<sub>2/3</sub> is known to suppress cryptic transcription initiation from coding regions in *Saccharomyces cerevisiae* by recruiting a repressive Rpd3 deacetylase complex to sites of active elongation (Carrozza et al., 2005; Keogh et al., 2005). It is also implicated in suppressing active incorporation of acetylated histones via histone exchange (Venkatesh et al., 2012). In cultured cells, ablation of human SETD2, which catalyzes H3K36 trimethylation, is suggested to alter a number of exon inclusion events by recruiting RNA binding proteins (Luco et al., 2010; Pradeepa et al., 2012). Conversely, H3K36me<sub>3</sub> distribution across gene bodies is itself sensitive to perturbations in splicing (de Almeida et al., 2011; Kim et al., 2011). In addition to its role in transcription and RNA processing, a range of other activities have been attributed to H3K36me, including X-chromosome dosage compensation (Larschan et al., 2007), DNA damage response (Jha and Strahl, 2014; Li et al., 2013; Pai et al., 2014; Pfister et al., 2014), and three dimensional chromosome organization (Evans et al., 2016; Smith et al., 2013; Ulianov et al., 2016). However, to date, none of these putative roles for H3K36me have been evaluated directly in an H3K36 mutant animal.

Here, we report a comprehensive analysis of H3K36 function, focused on differential gene expression, transcription initiation, and chromatin accessibility



phenotypes in transgenic *Drosophila* whose entire complement of replication-dependent H3 genes has been mutated to arginine at lysine 36 (H3K36R). Arginine approximates the charge and steric conformation of lysine, but cannot be targeted by lysine methyltransferases, and therefore represents an appropriate mutation with which to study the PTM-specific functions of H3K36. Although arginine is a conservative amino acid change, it also enables hydrogen bonding modalities that are distinct from those of lysine. In principle, in addition to phenotypes resulting from loss of H3K36 methylation, such a change could also result in other hypomorphic (partial loss of function) or neomorphic (gain of function) phenotypes.

In H3K36R mutants, we observed a decrease in the steady-state levels of highly expressed RNAs concomitant with increased transcription and productive expression from a variety of low-usage promoters. Though mutants exhibited bulk increases in histone acetylation, chromatin accessibility did not appreciably change at promoters. Surprisingly, we found that previously reported roles for H3K36 methylation, including suppression of transcription initiation in coding regions and regulation of alternative splicing, are not supported in *Drosophila* by transcription start-site (TSS) and poly-A RNA-seq analyses, respectively. Intriguingly, we found that certain genes are downregulated in H3K36R mutants but are rescued to wild-type levels by depletion of the Xrn1 exonuclease pacman, or the CCR4-Not deadenylase subunits, twin and Pop2. We posit a model whereby H3K36 methylation contributes to transcript fitness in order to maintain global transcriptome fidelity.

## Results

### H3K36R mutation causes widespread dysregulation of the transcriptome

We utilized a bacterial artificial chromosome (BAC)-based histone gene replacement platform (McKay et al., 2015) to generate *Drosophila* bearing a K36R substitution mutation in each of its replication-dependent histone H3 genes. Using this system, the endogenous histone gene cluster was deleted and complemented by a transgenic array of 12 copies of the native 5kb histone gene repeat (Fig 1). As

previously reported, H3K36R (K36R) mutants pupate at significantly reduced frequency compared to histone wild type (HWT) control animals, and fail to eclose into adults with 100% penetrance, despite exhibiting no obvious cell proliferation defects (McKay et al., 2015). Given the postulated role for H3K36 modification in co-transcriptional gene regulation, we sought to comprehensively compare the transcriptomic landscapes of HWT and K36R animals. We sequenced poly-A selected RNA, rRNA-depleted nuclear RNA, nucleosome depleted DNA (via ATAC-seq (Buenrostro et al., 2013)), and short, nascent, capped RNAs (Henriques et al., 2013; Nechaev et al., 2010) from 3<sup>rd</sup> instar larvae. Collectively these methods interrogate the major steps in mRNA biogenesis (Fig. 1).

We hypothesized that the K36R mutation would conform to a “cis-acting,” direct model, wherein effects are confined primarily to genes containing high levels of H3K36me3. However, when we analyzed genome-wide differential expression from poly-A RNA and stratified genes by the chromatin ‘states’ in which they reside (as defined in Kharchenko et al., 2011), gene expression changes were not confined to states characterized by high levels of H3K36 methylation (Fig. 2-Supplement 1A, states 1-4). Instead, when we stratified genes by H3K36me3 density ([www.modencode.org](http://www.modencode.org)), the mark was anticorrelated with gene expression change across the entire spectrum of H3K36me3 density, and largely uncorrelated with other methyl-states of H3K36 (Fig. 2A, Fig. 2B). Genes with high H3K36me3 density tended to decrease expression in K36R animals, whereas genes with low H3K36me3 density tended to increase expression in K36R animals. This finding suggests a global role for H3K36me in regulating gene expression, but one that is not confined to H3K36me3-rich loci, and therefore argues against an exclusively direct, local effect.

Because H3K36me3 is catalyzed co-transcriptionally (Kizer et al., 2005), and should therefore track roughly with gene expression, we also took the alternate approach of determining whether gene expression changes in K36R were correlated with the amount of expression normally observed in HWT. When we plotted differential expression against a specific transcript’s HWT level, we found that the effects of the K36R mutation were consistently anticorrelated with a gene’s HWT

expression level. That is, genes that were normally silent or lowly-expressed in HWT larvae experienced the largest relative increases in expression in K36R mutants, and highly expressed genes were preferentially reduced in K36R (Fig. 2C, Fig. 2-Supplement 1B). RT-qPCR validation of select transcripts confirmed this observation, arguing against the likelihood of bias due to normalized RNA input (Fig. 2-Supplement 1C). These results indicate that H3K36me-dependent expression changes could be caused by both direct (locus-specific) and indirect (locus-independent) effects.

### **H3K36 mutants exhibit increased histone acetylation, but unchanged global chromatin accessibility**

H3K36 methylation status has the potential to affect other histone PTMs, most notably H4 acetylation (H4ac) (Carrozza et al., 2005; Keogh et al., 2005) and H3K27 trimethylation (H3K27me3) (Lu et al., 2016; Yuan et al., 2011). This form of histone “crosstalk” might contribute to the observed gene expression phenotypes. To formally evaluate this possibility, we assayed bulk levels of H4ac and H3K27me3 by western blotting. H3K27me3 levels were slightly reduced in H3K36 mutants (Fig. 3A, Fig. 3-Supplement 1A), however characteristic polycomb target genes were largely unaffected (Fig. 2-Supplement 1A, Fig. 3-Supplement 1B). In contrast, H4ac levels were robustly increased (Fig. 3A, Fig. 3-Supplement 1A), confirming the previously identified link between H3K36me and H4ac (Carrozza et al., 2005; Keogh et al., 2005).

To assay the spatial distribution of H4ac, we stained polytene chromosomes with an H4K12ac antibody. In both HWT and K36R mutants, we found that H4K12ac intensity was anticorrelated with DAPI bright bands (Fig. 3-Supplement 1C). The DAPI bright regions are thought to correspond to more transcriptionally silent chromatin. Therefore, the observed hyperacetylation in K36R mutants occurs in the more actively transcribed (DAPI dark) regions, consistent with previous observations (Carrozza et al., 2005; Keogh et al., 2005). Given these findings, we initially hypothesized that H4 hyperacetylation might contribute positively to chromatin accessibility in promoter proximal regions of genes that are upregulated

in H3K36 mutants. To investigate this possibility, we carried out open chromatin profiling (ATAC-seq) and correlated these data with our differential expression (RNA-seq) analysis. Wild-type H4 acetylation density was also calculated using H4K16ac ChIP-seq datasets obtained from the modEncode consortium. As shown in Fig. 3-Supplement 1D, genes with the lowest levels of H4K16ac at their predicted promoters increased their expression levels in K36R mutants.

To localize open chromatin changes specifically to bona-fide sites of transcription initiation, we performed “Start-seq”, which precisely determines transcription initiation events by capturing nascent RNAs associated with early elongation complexes (Henriques et al., 2013; Nechaev et al., 2010). We adapted the protocol to isolate short, nascent, capped RNA from nuclei purified from 3<sup>rd</sup> instar larvae (see Methods). As shown in Fig. 3-Supplement 2A-C, Start-seq signal maps faithfully and robustly, with base-pair resolution, to annotated (observed) transcription start sites (obsTSSs), and demarcates sites of high nuclear RNA-seq. ATAC-seq signal accumulates most robustly in a window spanning roughly 150 nt upstream, and 50 nt downstream, of obsTSSs (Fig. 3-Supplement 2D). When we quantified HWT and K36R ATAC-seq signal from such a window surrounding all obsTSSs, we found that global changes in open chromatin were minimal between HWT and H3K36R animals (Fig. 3B). Furthermore, changes in ATAC-seq at obsTSSs and differential expression in their corresponding genes was largely uncorrelated, with a large proportion of genes exhibiting differential expression changes independent of increased chromatin accessibility (Fig. 3C). These results indicate that chromatin remodeling at promoters is not a major contributor to the observed global gene expression changes.

### **Cryptic transcription initiation does not contribute to gene expression changes in H3K36 mutants**

Given that increases in H4 acetylation in response to loss of H3K36me were thought to promote cryptic transcription in *S. cerevisiae* (Carrozza et al., 2005; Keogh et al., 2005), we evaluated potential cryptic initiation phenotypes in *Drosophila* H3K36 mutants. The consistent accumulation of Start-seq signal at bona-fide transcription

initiation sites (Fig. 3-Supplement 2A) shows that this method is particularly ideal for identifying novel initiation elsewhere in the genome. By quantifying Start-seq signal at loci outside of annotated start-sites (obsTSSs), we identified thousands of novel unannotated TSSs (nuTSSs) spread throughout the HWT genome, including a large proportion located within H3K36me3-enriched exons (Fig. 4A-B).

We examined whether the position of a nuTSS relative to its closest annotated gene had any bearing upon changes in nuTSS usage in K36R mutants. Because exons are characterized by higher overall H3K36me3 signal than introns, they might be more sensitive to pervasive initiation. Furthermore, antisense initiation might also be more prevalent in the absence of H3K36me, as has been observed in budding yeast (Carrozza et al., 2005; Keogh et al., 2005). To test these ideas, we sorted nuTSSs by their position (exonic or intronic) and orientation (sense or antisense) relative to the resident gene. Analysis of modEncode ChIP-seq read density in 400bp windows around each nuTSS confirmed that exonic nuTSSs are enriched for H3K36me3 relative to intronic ones (Fig. 4B). Similarly, exonic nuTSSs are depleted of ATAC-seq open chromatin signal (Fig. 4-Supplement 1A).

Contrary to expectation, exonic and antisense nuTSS usage was not dramatically increased in K36R mutants (Fig. 4B). Across all nuTSSs, we found that H3K36me3 density was anticorrelated with change in nuTSS “usage,” i.e. nuTSSs with lower signal in K36R than in HWT tended to have high H3K36me3 density, and vice-versa (Fig. 4-Supplement 1B-E). When we analyzed sense and antisense Start-seq reads mapping to annotated coding regions as a proxy for cryptic transcription in annotated genes, we found that antisense initiation did not globally accumulate in an H3K36me3-dependent manner (Fig. 4C). These results show that modification of replication-dependent H3K36 is not required to suppress cryptic transcription in gene bodies. Instead, we found that pervasive initiation in gene bodies is widespread throughout the *Drosophila* genome, even in the presence of H3K36me.

We also studied the change in nuTSS usage relative to gene boundaries. When absolute change in Start-seq signal at each nuTSS is scaled to gene length, increased nuTSS usage occurs almost exclusively in intergenic regions (Fig. 4D). Decreased usage is most prominent in the gene body, proximal to the 3' end (Fig.

4D). Metagene analysis shows that these regions correlate with H3K36me3 ChIP-seq density (Fig. 2A). Importantly, these findings do not support a role in *Drosophila* for H3K36me in suppressing cryptic antisense transcription, as described in yeast.

### **H3K36 mutation does not affect alternative splicing**

The H3K36me3 methyltransferase, SETD2, is reported to play a role in regulating alternative splice site choice (Luco et al., 2010; Pradeepa et al., 2012). To determine whether changes in pre-mRNA splicing contribute to gene expression differences between HWT and K36R, we used the MISO analysis package (Katz et al., 2010), which utilizes an annotated list of alternative splicing events, and quantitates changes between RNA-seq datasets. We found that very few annotated exon skipping events or retained intron events were significantly different between K36R and HWT, and there was no discernable bias toward inclusion or exclusion (Fig. 5A). Additionally, the majority of high-confidence differential splicing events we detected were mild changes at best ( $\Delta\text{PSI} < 0.25$ ), indicating that a lack of K36 modification had little effect on alternative splicing regulation in K36R mutants (Fig. 5B).

Inappropriate intron retention is another class of splicing defect observed in SETD2 mutants (Simon et al., 2014). To examine intron retention events, we quantitated junction (j) and non-junction (n) reads mapping to every exon-exon boundary represented in our RNA-seq dataset. As shown in Fig. 5C, we generated a retention ratio score (R) that measures the number of non-junction reads as a proportion of total reads (j+n). For junctions meeting statistical power requirements (>20 total reads), we observed no changes in the retention ratio, meaning that splice junction usage was unchanged in K36R (Fig. 5C). Taken together, these results support an H3K36me-dependent role for transcriptome regulation that is independent of alternative splicing.

### **A class of highly expressed genes is under-represented in poly-A vs. nuclear RNA fractions due to sensitivity to exonuclease degradation**

When comparing our poly-A and nuclear RNA-seq results, we identified a group of highly-expressed genes whose transcripts were reduced in the mutant poly-A RNA

fraction but not in the corresponding nuclear RNA fraction (Fig. 6A, see full RNA-seq results in Supplementary Table 1). Transcripts identified in the nuclear RNA-seq data represent populations of newly transcribed as well as nuclear-retained RNAs, whereas poly-A selected RNA is thought to be comprised primarily of “mature” mRNAs. We deduced that the observed differences between the two sequencing datasets could reflect a role for H3K36 in post-transcriptional, rather than co-transcriptional, mRNA maturation steps (e.g. nuclear RNA surveillance and export). Therefore, we selected a handful of mRNAs with large discrepancies between their nuclear and poly-A RNA-seq expression values (Fig. 6B) for validation and testing by RT-PCR. Fractionation of nuclear and cytoplasmic RNA from HWT and K36R larvae prior to reverse transcription revealed no significant changes in subcellular localization of the targets (Fig. 6-Supplement 1A), suggesting that a global block to mRNA export due to H3K36R mutation is unlikely.

In the absence of a transport block, we surmised that mRNA surveillance and degradation pathways might contribute to the reduced transcript levels observed in the poly-A fraction. We therefore hypothesized that perturbation of RNA exonuclease activity might rescue target transcript levels by preserving immature mRNAs that would otherwise be degraded. We analyzed the effect on target mRNAs of depleting *Rrp6* and *Xrn1/pacman* (*pcm* in flies) by RNA interference (RNAi), utilizing the Gal4-UAS expression system (Brand and Perrimon, 1993). Flies sourced from the Transgenic RNAi Project (Ni et al., 2011) expressing short-hairpin (sh)RNA constructs and Gal4-drivers were crossed into the HWT and K36R genetic backgrounds. Unfortunately, RNAi for *Rrp6* caused early larval lethality and animals of the appropriate genotype could not be obtained. However, we were able to introgress the *Xrn1/pcm* RNAi transgene into the HWT and K36R backgrounds and total RNA was prepared from whole 3<sup>rd</sup> instar larvae. As shown in Fig. 6C, the observed expression differences in poly-A RNA for a handful of highly expressed genes were restored to levels more similar to HWT in the K36R background by RNAi-mediated depletion of *pcm*. These results suggest that H3K36 contributes to post-transcriptional mRNA maturation in a manner that preserves target transcripts from exonuclease-mediated degradation.



## Defects in post-transcriptional processing contribute to gene expression changes in K36R mutants

mRNA degradation by *Xrn1/pcm* is preceded by two major surveillance steps: deadenylation by the CCR4-NOT complex, and decapping of the 7-methylguanosine (m7G) cap, primarily by the *Dcp2* decapping enzyme (Sheth and Parker, 2003). We therefore carried out RNAi against *CCR4/twin*, *CNOT7/Pop2*, and *Dcp2* in comparison with *Xrn1/pcm*. Across a panel of K36R downregulated genes, expression levels were rescued by depletion of *pcm*, *twin*, and *Pop2* (Fig. 6C), but not by RNAi against *Dcp2* (Fig. 6-Supplement 1B). Given the known redundancies in decapping enzymes (e.g. see Chang et al. 2012), the negative results for the *Dcp2* RNAi are inconclusive. Indeed, previous studies in S2 cells showed that depletion of *Dcp2* alone is insufficient to effectively inhibit decapping (Eulalio et al., 2007). However, the positive results we obtained by depleting deadenylase factors led us to focus on polyadenylation.

Changes in 3' end formation and polyadenylation, which occur proximal to the H3K36me3-rich chromatin at the 3' ends of genes, might render mRNAs more sensitive to surveillance and degradation. To investigate this possibility, we analyzed poly-A tail length in the *CCR4/twin* RNAi background for a YFP reporter transgene using a modified LM-PAT assay (Sallés et al., 1999), as illustrated in Fig. 6-Supplement 1C. It is important to note that expression of the *UAS:YFP* transgene is directly tied to Gal4 expression and thus YFP is the only transcript that is guaranteed to be expressed in the same cells as the *UAS:RNAi* transgene. *UAS:YFP* is similarly sensitive to *pcm* and *twin* as our cohort of endogenous genes (Fig. 6-Supplement 1D), making it an ideal reporter. As shown in Fig. 6D, we found that the YFP transcript displayed reduced poly-A tail length in K36R mutants, indicative of a role for H3K36 methylation over terminal exons in recruitment or functioning of the polyadenylation machinery. Importantly, the shorter poly-A tail in K36R mutants was independent of deadenylation activity (Fig. 6D), demonstrating that the defect is in polyadenylation, not in the subsequent *CCR4/twin*- or *CNOT7/Pop2*-dependent deadenylation. Additional experiments will be needed to determine the prevalence of poly-A tail length changes in the K36R mutants transcriptome wide.



Computational analysis of differential poly-A site usage demonstrated no change (Fig. 6-Supplement 1E), indicating that poly-A site specification was largely unaffected by mutation of H3K36. In summary, these data uncover a post-transcriptional role for H3K36 in the regulation of metazoan gene expression.

## Discussion

In this study, we focus on the role of H3K36 in transcriptome fidelity, assayed at the levels of transcription initiation, elongation, pre-mRNA splicing and maturation. Crucially, most of the studies on the roles of H3K36me3 in animal cells deplete SETD2 or its orthologue, making it difficult to discern the specific role of the histone residue itself. Enzymes that catalyze histone PTMs often have numerous non-histone substrates or non-catalytic structural roles that can confound analysis (Biggar and Li, 2015; Huang and Berger, 2008; Sims and Reinberg, 2008; Zhang et al., 2015). Notably, alpha-tubulin was recently identified as a non-histone substrate of SETD2 (Park et al., 2016). Perhaps more importantly, SETD2 catalyzes trimethylation of lysine 36 in both the “canonical” replication-dependent H3 and in the replication-independent histone variant, H3.3. H3.3 is thought to play a particularly important role in transcriptionally active regions where H3K36 methylation is enriched (Ahmad and Henikoff, 2002). Indeed, a protein with specific affinity for SETD2-catalyzed trimethylation of lysine 36 of the histone H3.3 variant was shown to serve as a regulator of RNA pol II elongation (Wen et al., 2014) and to associate with components of spliceosomal snRNPs to regulate co-transcriptional alternative mRNA splicing (Guo et al., 2014). Beyond its other substrates, SETD2’s prominent association with the C-terminal domain of RNA pol II (Kizer et al., 2005) makes it likely that ablating this protein will result in transcriptional consequences that are unrelated to its catalytic activity. In view of these complications, the direct analysis of histone residue function enabled by our BAC-based gene replacement system is particularly well suited to the study of H3K36me in the context of transcriptional regulation.

In budding yeast, H3K36me<sub>2/3</sub> has been shown to negatively regulate histone acetylation within actively transcribed genes, both by recruiting a repressive Rpd3S deacetylase complex (Carrozza et al., 2005; Keogh et al., 2005) and by suppressing incorporation of acetylated nucleosomes at sites of RNA polymerase II-initiated nucleosome displacement (Venkatesh et al., 2012). However, a similar role has not yet been elucidated for H3K36me in animals, and studies that have correlated cryptic transcription with H3K36 methylation in metazoan systems have done so only through perturbation of the SETD2 writer enzyme (Carvalho et al., 2013; Xie et al., 2011). Furthermore, studies have implicated H3K36me<sub>3</sub> in alternative splicing in human cell culture (Luco et al., 2010; Pradeepa et al., 2012) and inefficient intron splicing in clear cell renal cell carcinomas (Simon et al., 2014), again via SETD2 mutation. In this study, we used histone replacement to define whether modification of canonical H3K36 is responsible for these functions.

We demonstrate that H3K36 is neither a significant contributor to the regulation of alternative splice site choice, nor the efficiency of canonical intron removal. We also present evidence that methylation of H3K36 does not suppress cryptic transcription in coding regions. Given the unprecedented depth of our Start-seq dataset (>200M reads per genotype), even very rare events would have been detected. To the contrary, we found evidence for pervasive initiation (both sense and anti-sense) events that largely fail to appear in the steady-state RNA population under wild type conditions. Interestingly, we confirm that H4 acetylation is strongly suppressed by H3K36 modification, despite the fact that cryptic transcripts do not appear. This finding argues for an uncoupling of H4ac levels from cryptic initiation in coding regions in metazoans, and suggests that the suppression of cryptic transcription initiation in multicellular organisms may be more complex than previously appreciated.

One potential explanation for the discrepancy between our results and previous studies of SETD2 could be that modification of the aforementioned histone variant, H3.3, is the primary functional contributor to the cryptic initiation or splicing phenotypes. Elucidating the effects of H3.3K36 methylation is outside the scope of this work, and thus phenotypes that have been reported in the literature as

being sensitive to H3K36 methylation might plausibly respond specifically to H3.3K36 methylation. In fact, this serves as a useful feature of histone replacement in this context, since a functional separation of H3 and H3.3 lysine 36 methylation cannot be otherwise achieved. However, this possibility should be tempered by the fact that we observed very low levels of H3K36me3 signal in both western blots from H3K36R mutant larvae (Fig. 3A) and immunofluorescent staining of salivary gland polytene chromosomes (McKay et al., 2015). Thus H3.3 is, at best, a minor contributor to total H3K36me3. Future experiments testing the transcriptional consequences of direct mutation of H3.3K36, both on its own and in combination with mutation of replication-dependent H3K36, will better define their contributions.

Finally, we present evidence that H3K36 is required for proper mRNA maturation, providing a post-transcriptional benefit across a range of highly expressed genes. Additional studies will be required in order to elucidate a detailed molecular mechanism for this process. Our genetic suppression data suggest that this mRNA ‘fitness’ benefit is somehow linked to the efficiency of 3' end formation or polyadenylation (Figs. 6B-D). Interestingly, H3K36me3 depletion in SETD2-mutant renal cell carcinoma has been correlated with defects in transcriptional termination and readthrough into neighboring genes (Grosso et al., 2015), suggesting that H3K36 methylation might influence termination and polyadenylation. Indeed, the enrichment of H3K36me3 at the 3' ends of genes makes it a likely candidate to interface with these activities. Another possibility is that H3K36 modification might recruit some type of RNA modifying enzyme. For example, Jaffrey and colleagues recently showed that dimethylation (N<sup>6</sup>,2'-O-dimethyladenosine, or m<sup>6</sup>A<sub>m</sub>) of the nucleotide adjacent to the m<sup>7</sup>G cap enhances transcript stability (Mauer et al., 2017). Moreover, H3K36 might contribute to mRNA maturation across multiple processing steps, with the combined effect of protecting target mRNAs from surveillance and eventual degradation.

The prevailing model for histone PTM modulation of gene expression, reinforced by recent direct evidence (Hilton et al., 2015), suggests that it occurs directly proximal to the site of histone modification. However, the fact that genomic

regions largely lacking H3K36me exhibit differential expression in K36R mutants argues against this idea. For that reason, a model for H3K36 control of gene expression should also consider indirect mechanisms. For example, it is possible that the rate of transcribing polymerase through nucleosomes that are modified at H3K36 might change, and therefore the capping, cleavage and polyadenylation machinery that associates with the C-terminal domain of RNA polymerase II (Ho et al., 1998; McCracken et al., 1997) might become improperly distributed in K36R mutants. Alternatively, SETD2 could have additional (unknown) substrates that function in these processes. Finally, H3K36me's previously reported role in three-dimensional genome organization (Evans et al., 2016; Smith et al., 2013; Ulianov et al., 2016) might extend to the concentration of factors related to mRNA maturation at sites of active transcription, which would be impaired upon H3K36 mutation. Future studies using alternative genetic approaches, including specific ablation of the catalytic activity of “writers” to cross-reference our observations, should be instructive in this regard.

## Methods

### RNA library preparation for sequencing

RNA-seq libraries were prepared using the Illumina TruSeq stranded library preparation kit from RNA prepared with TRIzol reagent (Thermo Fisher) from either whole 3<sup>rd</sup> instar larvae (poly-A) or nuclei isolated from 3<sup>rd</sup> instar larvae (nuclear) (adapted from (Nechaev et al., 2010)). Start-seq libraries were prepared as previously described (Henriques et al., 2013; Nechaev et al., 2010). Sequencing was carried out on a HiSeq2000 (ATAC-seq, poly-A and nuclear RNA-seq) or NextSeq500 (Start-seq) (Illumina). For all assays, at least three biological replicates were prepared (four in the case of Start-seq and nuclear RNA-seq).

### Start-seq

Total nuclear RNA from whole 3<sup>rd</sup> instar larvae was used as input to each Start-seq library. For each RNA replicate used as input for a Start-seq library, 80 whole 3<sup>rd</sup> instar larvae were collected. Five whole 3<sup>rd</sup> instar larvae were selected for genomic

DNA recovery via phenol chloroform extraction and ethanol precipitation in order to normalize Start-seq RNA spike-in controls to DNA content. The remaining (75) larvae were washed 3x with ice cold 1x ENIB buffer (15mM Hepes pH7.6; 10mM KCl; 3mM CaCl<sub>2</sub>; 2mM MgCl<sub>2</sub>; 0.1% Triton X-100; 1mM DTT; 1mM PMSF), and were then combined with 1 volume 0.3 M ENIB (1x ENIB + 0.3 M Sucrose). Larvae were homogenized in a 1 mL dounce with 10 strokes with a type A pestle. Each replicate required douncing in three separate aliquots so as to avoid oversaturation of the dounce with larval cuticle, and homogenate was immediately transferred to ice once completed. Dounce was washed with 1 volume 0.3 M ENIB, combined with homogenate, and mixture was homogenized with 10 strokes with a type B pestle. Resulting homogenate was filtered through 40 µM Nitex mesh into a 50 mL conical tube on ice. For each 150 µL of filtered homogenate produced, a sucrose cushion was made by layering 400 µL 1.7 M ENIB followed by 400 µL 0.8 M ENIB in a 1.5 mL Eppendorf tube. 150 µL filtered homogenate was pipetted onto cushion, and spun at 20000xg for 15 minutes at 4°C. After spinning, lipid residue was carefully removed from the walls of the tube with a micropipettor, and then the remainder of the supernatant was removed. The nuclear pellet was homogenized in 100 µL 0.3 M ENIB, and 10 µL was removed, stained with Trypan Blue, and observed under a microscope to confirm efficient nuclear isolation. Total RNA was extracted from the remaining homogenate with Trizol reagent using standard manufacturer's protocols. Start-seq libraries were prepared from nuclear RNA as previously described (Henriques et al., 2013; Nechaev et al., 2010). Libraries were sequenced on a NextSeq500 generating paired-end, 26 nt reads.

#### Poly-A-selected RNA-seq

For each replicate, total RNA from 25 whole 3<sup>rd</sup> instar larvae was isolated using Trizol reagent according to manufacturer's protocols. RNA-seq libraries were generated with the Tru-seq Stranded Poly-A RNA-seq library preparation kit (Illumina). Libraries were sequenced on a HiSeq2000 generating paired-end, 100 nt reads (Illumina).

### Nuclear RNA-seq

Nuclei from whole 3rd instar larvae were isolated as described above for Start-seq, and RNA was extracted using Trizol reagent. Total nuclear RNA was used as input to Ribo-zero Stranded RNA-seq library preparation (Illumina). Libraries were sequenced on a HiSeq2000 generating paired-end, 50nt reads (Illumina).

### ATAC-seq library preparation

For each replicate, nuclei from 10 whole 3rd instar larvae were isolated as per Start-seq and nuclear pellets were gently homogenized with wide-bore pipette tips in 50  $\Delta$ uL ATAC-seq lysis buffer (10 mM Tris-Cl, pH 7.4, 10 mM NaCl, 3 mM MgCl<sub>2</sub>, 0.1% (v/v) Igepal CA-630), and homogenate was directly used as input to the Nextera DNA library preparation kit (NEB) for tagmentation of chromatinized DNA, as described in Buenrosto *et al.* 2013. Libraries were sequenced on a HiSeq2000 generating single-end, 100 nt reads (Illumina).

### Bioinformatic analysis

Sequencing reads were mapped to the dm3 reference genome using Bowtie2 (Langmead and Salzberg, 2012) (ATAC-seq, Start-seq) or Tophat (Trapnell et al., 2012) (RNA-seq) default parameters. We used DESeq2 (Love et al., 2014) for differential expression analysis and Cufflinks (Trapnell et al., 2012) for novel transcript detection. We used the MISO package (Katz et al., 2010) to analyze annotated alternative splicing events, and custom scripts (Supplementary File 4) to analyze global splice junction usage. Start-seq and ATAC-seq reads were mapped using Bowtie2 (Langmead and Salzberg, 2012), and Poly-A and nuclear RNA-seq reads were mapped using the Tophat gapped read aligner (Trapnell et al., 2012). Boxplots and Start-seq plots scaled to gene length were generated using ggplot2 in R ([www.r-project.org](http://www.r-project.org)).

For Start-seq, reads were quantified at base-pair resolution using a custom script (Supplementary File 3), and nucleotide-specific raw read counts were normalized based on reads mapping to RNA spike-in controls. Exonic, intronic, and intergenic locations were determined using the dm3 gene model.

For Poly-A and nuclear RNA-seq: to analyze annotated alternative splicing, we used MISO (Katz et al., 2010), and considered splicing events with a) a Bayes score

greater than 10 with all replicates combined, b) and consistent directionality of  $\Delta$ PSI in each of the three individual replicates, as significant. To analyze global splice junction usage, we used a custom script (Supplementary File 4) to quantify reads spanning the junction location that either map to it (“junction”, i.e. containing an “N” CIGAR designation that maps precisely to the junction in question) or through it (“non-junction”). To analyze differential expression, we used DESeq2 (Love et al., 2014) to quantify log<sub>2</sub> fold change in normalized read counts between K36R and HWT. To analyze alternative polyadenylation, we used DaPars (Xia et al., 2014). All ChIP-seq data were downloaded from modEncode ([www.modencode.org](http://www.modencode.org)). In all cases, data were derived from the 3<sup>rd</sup> instar larval time point as determined by modEncode developmental staging procedures. For ChIP-seq and ATAC-seq, metagene plots were generated using the Deeptools package (Ramírez et al., 2014).  
Reverse transcription and PCR assays

RNA was isolated with TRIzol reagent as described above, and reverse transcription was performed using random hexamers and Superscript III (Invitrogen), according to the manufacturer’s protocols. For semi-quantitative PCR analysis, products were run on a 2% agarose gel, and bands were quantified using ImageJ. For qPCR, Maxima SYBR Green/ROX qPCR Master Mix (Thermo Scientific) was used. All qPCR analyses are based on three biological replicates, plotted with standard error.

For semi-quantitative PCR, PCR reactions were prepared in biological triplicate using 2x Red Master Mix (Apex Bioscience), and targets were amplified for 35 cycles of PCR with a 95°C denaturation step, a 60°C annealing step, and a 72°C elongation step. Reactions were run on a 2% agarose gel with EtBr for 30 minutes at 90V, and bands were imaged on a UV transilluminator (GE Healthcare) and quantified using ImageJ. For RT-qPCR, reactions were prepared in biological triplicate using Maxima SYBR Green/ROX qPCR Master Mix (Thermo Scientific), and fluorescence was monitored across 40 cycles in 96 well plate format.

For LM-PAT, 1 µg total RNA was incubated with 5 pmol preadenylated ImPAT anchor primer (ppApCAGCTGTAGCTATGCGCACCGAGTCAGATCAG) (adenylated using 5’ DNA Adenylation Kit, NEB), and ligated with T4 RNA Ligase 2, truncated K227Q (NEB) using manufacturers protocol. Ligated RNA was reverse-transcribed



with Superscript III (Life Technologies) using an ImPAT RT primer (GACTCGGTGCGCATAGCTACAGCTG). Resulting first-strand cDNA was PCR-amplified using gene-specific forward primers (see Supplementary Table 2) paired with nested ImPAT RT primers that contain terminal thymidines (GTGCGCATAGCTACAGCTGTTTT). PCR conditions were as follows: a preliminary round consisted of 12 cycles in which the annealing step was decreased by one degree Celsius in each cycle from 71°C to 60°C (between 95°C and 72°C denaturation and elongation steps, respectively), followed by 18 additional cycles with an annealing temperature at 60°C. After completion of the first round, 2 µL PCR product was used as template for a second round of PCR amplification with 25 cycles and an annealing temperature at 60°C. For “tail” measurement, template was amplified with a nested gene-specific forward primer and ImPAT nested RT reverse primer. For “UTR” measurement, template was amplified with a nested gene-specific forward primer and a “TVN” primer anchored at the 3’ UTR terminus.

#### Western Blotting

For each replicate, nuclei from 30 whole 3rd instar larvae were isolated as per Start-seq and homogenized in 50 µL Extraction Buffer (320 mM (NH<sub>4</sub>)<sub>2</sub>SO<sub>4</sub>, 200 mM Tris HCl (pH 8.0), 20 mM EDTA, 10 mM EGTA, 5 mM MgCl<sub>2</sub>, 1 mM DTT, 1x Protease Inhibitor Cocktail (Roche)). Mixture was spun at 15000xg for 5 minutes at 4°C and supernatant was recovered and immediately used in polyacrylamide gel electrophoresis. Gel was transferred to PVDF membrane and incubated with rabbit anti-H3 (Abcam, ab1791), rabbit anti-H3K36me3 (Abcam, ab9050), mouse anti-H3K27me3 (Abcam, ab6002), or rabbit anti-H4ac (Active Motif, #39177) primary antibody overnight. We used ImageJ to quantify western blot band intensities, and calculated ratios of K36R/HWT intensity for each target across two independent biological replicates. Student’s t-test was used to obtain p-values for ratio comparisons between H3 and other targets.

#### Immunofluorescence

Salivary gland polytene chromosome squashes were performed on 3<sup>rd</sup> instar larvae as previously described (McKay et al., 2015), using rabbit anti-H4K12ac polyclonal primary antibody (Active Motif, #39165) overnight, followed by AlexaFluor 594



goat anti-rabbit secondary antibody (ThermoFisher) for two hours, then DAPI for 10 minutes.

## Acknowledgements

We thank the UNC High Throughput Sequencing Facility for library preparation and general expertise, the TRiP at Harvard Medical School (NIH/NIGMS R01-GM084947) for providing transgenic RNAi fly stocks used in this study, members of the UNC Histone Replacement Consortium for critical review of data and figures, and Kayla Peck for help with plotting. M.P.M. was supported by an NIH predoctoral fellowship, F31-CA177088. This work was supported by the NIH Epigenomics Roadmap Project, R01-DA036897 (to A.G.M, B.D.S and R.J.D.), and by the Intramural Research Program of the NIH (Z01-ES101987), National Institute of Environmental Health Sciences (to K.A.).

## References

- Ahmad, K., and Henikoff, S. (2002). The histone variant H3.3 marks active chromatin by replication-independent nucleosome assembly. *Mol. Cell* 9, 1191–1200.
- de Almeida, S.F., Grosso, A.R., Koch, F., Fenouil, R., Carvalho, S., Andrade, J., Levezinho, H., Gut, M., Eick, D., Gut, I., et al. (2011). Splicing enhances recruitment of methyltransferase HYPB/Setd2 and methylation of histone H3 Lys36. *Nat. Struct. Mol. Biol.* 18, 977–983.
- Bannister, A.J., and Kouzarides, T. (2011). Regulation of chromatin by histone modifications. *Cell Res.* 21, 381–395.
- Bannister, A.J., Schneider, R., Myers, F.A., Thorne, A.W., Crane-Robinson, C., and Kouzarides, T. (2005). Spatial distribution of di- and tri-methyl lysine 36 of histone H3 at active genes. *J. Biol. Chem.* 280, 17732–17736.

- Biggar, K.K., and Li, S.S.-C. (2015). Non-histone protein methylation as a regulator of cellular signalling and function. *Nat. Rev. Mol. Cell Biol.* *16*, 5–17.
- Brand, A.H., and Perrimon, N. (1993). Targeted gene expression as a means of altering cell fates and generating dominant phenotypes. *Dev. Camb. Engl.* *118*, 401–415.
- Buenrostro, J.D., Giresi, P.G., Zaba, L.C., Chang, H.Y., and Greenleaf, W.J. (2013). Transposition of native chromatin for fast and sensitive epigenomic profiling of open chromatin, DNA-binding proteins and nucleosome position. *Nat. Methods* *10*, 1213–1218.
- Carrozza, M.J., Li, B., Florens, L., Suganuma, T., Swanson, S.K., Lee, K.K., Shia, W.-J., Anderson, S., Yates, J., Washburn, M.P., et al. (2005). Histone H3 methylation by Set2 directs deacetylation of coding regions by Rpd3S to suppress spurious intragenic transcription. *Cell* *123*, 581–592.
- Carvalho, S., Raposo, A.C., Martins, F.B., Grosso, A.R., Sridhara, S.C., Rino, J., Carmo-Fonseca, M., and de Almeida, S.F. (2013). Histone methyltransferase SETD2 coordinates FACT recruitment with nucleosome dynamics during transcription. *Nucleic Acids Res.* *41*, 2881–2893.
- Chang, J.H., Jiao, X., Chiba, K., Oh, C., Martin, C.E., Kiledjian, M., and Tong, L. (2012). Dxo1 is a new type of eukaryotic enzyme with both decapping and 5'-3' exoribonuclease activity. *Nat. Struct. Mol. Biol.* *19*, 1011–1017.
- Chi, P., Allis, C.D., and Wang, G.G. (2010). Covalent histone modifications--miswritten, misinterpreted and mis-erased in human cancers. *Nat. Rev. Cancer* *10*, 457–469.
- Eulalio, A., Rehwinkel, J., Stricker, M., Huntzinger, E., Yang, S.-F., Doerks, T., Dorner, S., Bork, P., Boutros, M., and Izaurralde, E. (2007). Target-specific requirements for enhancers of decapping in miRNA-mediated gene silencing. *Genes Dev.* *21*, 2558–2570.

- Evans, K.J., Huang, N., Stempor, P., Chesney, M.A., Down, T.A., and Ahringer, J. (2016). Stable *Caenorhabditis elegans* chromatin domains separate broadly expressed and developmentally regulated genes. *Proc. Natl. Acad. Sci. U. S. A.*
- Graves, H.K., Wang, P., Lagarde, M., Chen, Z., and Tyler, J.K. (2016). Mutations that prevent or mimic persistent post-translational modifications of the histone H3 globular domain cause lethality and growth defects in *Drosophila*. *Epigenetics Chromatin* 9, 9.
- Grosso, A.R., Leite, A.P., Carvalho, S., Matos, M.R., Martins, F.B., Vítor, A.C., Desterro, J.M.P., Carmo-Fonseca, M., and de Almeida, S.F. (2015). Pervasive transcription read-through promotes aberrant expression of oncogenes and RNA chimeras in renal carcinoma. *eLife* 4.
- Günesdogan, U., Jäckle, H., and Herzig, A. (2010). A genetic system to assess in vivo the functions of histones and histone modifications in higher eukaryotes. *EMBO Rep.* 11, 772–776.
- Guo, R., Zheng, L., Park, J.W., Lv, R., Chen, H., Jiao, F., Xu, W., Mu, S., Wen, H., Qiu, J., et al. (2014). BS69/ZMYND11 reads and connects histone H3.3 lysine 36 trimethylation-decorated chromatin to regulated pre-mRNA processing. *Mol. Cell* 56, 298–310.
- Henriques, T., Gilchrist, D.A., Nechaev, S., Bern, M., Muse, G.W., Burkholder, A., Fargo, D.C., and Adelman, K. (2013). Stable pausing by RNA polymerase II provides an opportunity to target and integrate regulatory signals. *Mol. Cell* 52, 517–528.
- Hilton, I.B., D'Ippolito, A.M., Vockley, C.M., Thakore, P.I., Crawford, G.E., Reddy, T.E., and Gersbach, C.A. (2015). Epigenome editing by a CRISPR-Cas9-based acetyltransferase activates genes from promoters and enhancers. *Nat. Biotechnol.* 33, 510–517.
- Ho, C.K., Sriskanda, V., McCracken, S., Bentley, D., Schwer, B., and Shuman, S. (1998). The guanylyltransferase domain of mammalian mRNA capping enzyme binds to

the phosphorylated carboxyl-terminal domain of RNA polymerase II. *J. Biol. Chem.* 273, 9577–9585.

Hödl, M., and Basler, K. (2012). Transcription in the absence of histone H3.2 and H3K4 methylation. *Curr. Biol.* CB 22, 2253–2257.

Huang, J., and Berger, S.L. (2008). The emerging field of dynamic lysine methylation of non-histone proteins. *Curr. Opin. Genet. Dev.* 18, 152–158.

Jenuwein, T., and Allis, C.D. (2001). Translating the histone code. *Science* 293, 1074–1080.

Jha, D.K., and Strahl, B.D. (2014). An RNA polymerase II-coupled function for histone H3K36 methylation in checkpoint activation and DSB repair. *Nat. Commun.* 5, 3965.

Katz, Y., Wang, E.T., Airolidi, E.M., and Burge, C.B. (2010). Analysis and design of RNA sequencing experiments for identifying isoform regulation. *Nat. Methods* 7, 1009–1015.

Keogh, M.-C., Kurdistani, S.K., Morris, S.A., Ahn, S.H., Podolny, V., Collins, S.R., Schuldiner, M., Chin, K., Punna, T., Thompson, N.J., et al. (2005). Cotranscriptional set2 methylation of histone H3 lysine 36 recruits a repressive Rpd3 complex. *Cell* 123, 593–605.

Kharchenko, P.V., Alekseyenko, A.A., Schwartz, Y.B., Minoda, A., Riddle, N.C., Ernst, J., Sabo, P.J., Larschan, E., Gorchakov, A.A., Gu, T., et al. (2011). Comprehensive analysis of the chromatin landscape in *Drosophila melanogaster*. *Nature* 471, 480–485.

Kim, S., Kim, H., Fong, N., Erickson, B., and Bentley, D.L. (2011). Pre-mRNA splicing is a determinant of histone H3K36 methylation. *Proc. Natl. Acad. Sci. U. S. A.* 108, 13564–13569.

- Kizer, K.O., Phatnani, H.P., Shibata, Y., Hall, H., Greenleaf, A.L., and Strahl, B.D. (2005). A novel domain in Set2 mediates RNA polymerase II interaction and couples histone H3 K36 methylation with transcript elongation. *Mol. Cell. Biol.* 25, 3305–3316.
- Kolasinska-Zwierz, P., Down, T., Latorre, I., Liu, T., Liu, X.S., and Ahringer, J. (2009). Differential chromatin marking of introns and expressed exons by H3K36me3. *Nat. Genet.* 41, 376–381.
- Langmead, B., and Salzberg, S.L. (2012). Fast gapped-read alignment with Bowtie 2. *Nat. Methods* 9, 357–359.
- Larschan, E., Alekseyenko, A.A., Gortchakov, A.A., Peng, S., Li, B., Yang, P., Workman, J.L., Park, P.J., and Kuroda, M.I. (2007). MSL complex is attracted to genes marked by H3K36 trimethylation using a sequence-independent mechanism. *Mol. Cell* 28, 121–133.
- Lewis, P.W., Müller, M.M., Koletsky, M.S., Cordero, F., Lin, S., Banaszynski, L.A., Garcia, B.A., Muir, T.W., Becher, O.J., and Allis, C.D. (2013). Inhibition of PRC2 activity by a gain-of-function H3 mutation found in pediatric glioblastoma. *Science* 340, 857–861.
- Li, F., Mao, G., Tong, D., Huang, J., Gu, L., Yang, W., and Li, G.-M. (2013). The histone mark H3K36me3 regulates human DNA mismatch repair through its interaction with MutS $\alpha$ . *Cell* 153, 590–600.
- Love, M.I., Huber, W., and Anders, S. (2014). Moderated estimation of fold change and dispersion for RNA-seq data with DESeq2. *Genome Biol.* 15, 550.
- Lu, C., Jain, S.U., Hoelper, D., Bechet, D., Molden, R.C., Ran, L., Murphy, D., Venneti, S., Hameed, M., Pawel, B.R., et al. (2016). Histone H3K36 mutations promote sarcomagenesis through altered histone methylation landscape. *Science* 352, 844–849.

- Luco, R.F., Pan, Q., Tominaga, K., Blencowe, B.J., Pereira-Smith, O.M., and Misteli, T. (2010). Regulation of alternative splicing by histone modifications. *Science* 327, 996–1000.
- Luger, K., Mäder, A.W., Richmond, R.K., Sargent, D.F., and Richmond, T.J. (1997). Crystal structure of the nucleosome core particle at 2.8 Å resolution. *Nature* 389, 251–260.
- Margueron, R., and Reinberg, D. (2010). Chromatin structure and the inheritance of epigenetic information. *Nat. Rev. Genet.* 11, 285–296.
- Mauer, J., Luo, X., Blanjoie, A., Jiao, X., Grozhik, A.V., Patil, D.P., Linder, B., Pickering, B.F., Vasseur, J.-J., Chen, Q., et al. (2017). Reversible methylation of m(6)Am in the 5' cap controls mRNA stability. *Nature* 541, 371–375.
- McCracken, S., Fong, N., Yankulov, K., Ballantyne, S., Pan, G., Greenblatt, J., Patterson, S.D., Wickens, M., and Bentley, D.L. (1997). The C-terminal domain of RNA polymerase II couples mRNA processing to transcription. *Nature* 385, 357–361.
- McKay, D.J., Klusza, S., Penke, T.J.R., Meers, M.P., Curry, K.P., McDaniel, S.L., Malek, P.Y., Cooper, S.W., Tatomer, D.C., Lieb, J.D., et al. (2015). Interrogating the function of metazoan histones using engineered gene clusters. *Dev. Cell* 32, 373–386.
- Nechaev, S., Fargo, D.C., dos Santos, G., Liu, L., Gao, Y., and Adelman, K. (2010). Global analysis of short RNAs reveals widespread promoter-proximal stalling and arrest of Pol II in *Drosophila*. *Science* 327, 335–338.
- Ni, J.-Q., Zhou, R., Czech, B., Liu, L.-P., Holderbaum, L., Yang-Zhou, D., Shim, H.-S., Tao, R., Handler, D., Karpowicz, P., et al. (2011). A genome-scale shRNA resource for transgenic RNAi in *Drosophila*. *Nat. Methods* 8, 405–407.
- Pai, C.-C., Deegan, R.S., Subramanian, L., Gal, C., Sarkar, S., Blaikley, E.J., Walker, C., Hulme, L., Bernhard, E., Codlin, S., et al. (2014). A histone H3K36 chromatin

switch coordinates DNA double-strand break repair pathway choice. *Nat. Commun.* 5, 4091.

Park, I.Y., Powell, R.T., Tripathi, D.N., Dere, R., Ho, T.H., Blasius, T.L., Chiang, Y.-C., Davis, I.J., Fahey, C.C., Hacker, K.E., et al. (2016). Dual Chromatin and Cytoskeletal Remodeling by SETD2. *Cell* 166, 950–962.

Pengelly, A.R., Copur, Ö., Jäckle, H., Herzig, A., and Müller, J. (2013). A histone mutant reproduces the phenotype caused by loss of histone-modifying factor Polycomb. *Science* 339, 698–699.

Penke, T.J.R., McKay, D.J., Strahl, B.D., Matera, A.G., and Duronio, R.J. (2016). Direct interrogation of the role of H3K9 in metazoan heterochromatin function. *Genes Dev.* 30, 1866–1880.

Pfister, S.X., Ahrabi, S., Zalmas, L.-P., Sarkar, S., Aymard, F., Bachrati, C.Z., Helleday, T., Legube, G., La Thangue, N.B., Porter, A.C.G., et al. (2014). SETD2-dependent histone H3K36 trimethylation is required for homologous recombination repair and genome stability. *Cell Rep.* 7, 2006–2018.

Pradeepa, M.M., Sutherland, H.G., Ule, J., Grimes, G.R., and Bickmore, W.A. (2012). Psip1/Ledgf p52 binds methylated histone H3K36 and splicing factors and contributes to the regulation of alternative splicing. *PLoS Genet.* 8, e1002717.

Quinlan, A.R., and Hall, I.M. (2010). BEDTools: a flexible suite of utilities for comparing genomic features. *Bioinforma. Oxf. Engl.* 26, 841–842.

Ramírez, F., Dündar, F., Diehl, S., Grüning, B.A., and Manke, T. (2014). deepTools: a flexible platform for exploring deep-sequencing data. *Nucleic Acids Res.* 42, W187-191.

Rice, J.C., Briggs, S.D., Ueberheide, B., Barber, C.M., Shabanowitz, J., Hunt, D.F., Shinkai, Y., and Allis, C.D. (2003). Histone methyltransferases direct different

degrees of methylation to define distinct chromatin domains. *Mol. Cell* 12, 1591–1598.

Rothbart, S.B., and Strahl, B.D. (2014). Interpreting the language of histone and DNA modifications. *Biochim. Biophys. Acta* 1839, 627–643.

Sallés, F.J., Richards, W.G., and Strickland, S. (1999). Assaying the polyadenylation state of mRNAs. *Methods San Diego Calif* 17, 38–45.

Schneider, R., Bannister, A.J., Myers, F.A., Thorne, A.W., Crane-Robinson, C., and Kouzarides, T. (2004). Histone H3 lysine 4 methylation patterns in higher eukaryotic genes. *Nat. Cell Biol.* 6, 73–77.

Schwartz, Y.B., Kahn, T.G., Nix, D.A., Li, X.-Y., Bourgon, R., Biggin, M., and Pirrotta, V. (2006). Genome-wide analysis of Polycomb targets in *Drosophila melanogaster*. *Nat. Genet.* 38, 700–705.

Sheth, U., and Parker, R. (2003). Decapping and decay of messenger RNA occur in cytoplasmic processing bodies. *Science* 300, 805–808.

Simon, J.M., Hacker, K.E., Singh, D., Brannon, A.R., Parker, J.S., Weiser, M., Ho, T.H., Kuan, P.-F., Jonasch, E., Furey, T.S., et al. (2014). Variation in chromatin accessibility in human kidney cancer links H3K36 methyltransferase loss with widespread RNA processing defects. *Genome Res.* 24, 241–250.

Sims, R.J., and Reinberg, D. (2008). Is there a code embedded in proteins that is based on post-translational modifications? *Nat. Rev. Mol. Cell Biol.* 9, 815–820.

Smith, H.F., Roberts, M.A., Nguyen, H.Q., Peterson, M., Hartl, T.A., Wang, X.-J., Klebba, J.E., Rogers, G.C., and Bosco, G. (2013). Maintenance of interphase chromosome compaction and homolog pairing in *Drosophila* is regulated by the condensin cap-h2 and its partner Mrg15. *Genetics* 195, 127–146.



- Strahl, B.D., and Allis, C.D. (2000). The language of covalent histone modifications. *Nature* **403**, 41–45.
- Sullivan, B.A., and Karpen, G.H. (2004). Centromeric chromatin exhibits a histone modification pattern that is distinct from both euchromatin and heterochromatin. *Nat. Struct. Mol. Biol.* **11**, 1076–1083.
- Taverna, S.D., Li, H., Ruthenburg, A.J., Allis, C.D., and Patel, D.J. (2007). How chromatin-binding modules interpret histone modifications: lessons from professional pocket pickers. *Nat. Struct. Mol. Biol.* **14**, 1025–1040.
- Trapnell, C., Roberts, A., Goff, L., Pertea, G., Kim, D., Kelley, D.R., Pimentel, H., Salzberg, S.L., Rinn, J.L., and Pachter, L. (2012). Differential gene and transcript expression analysis of RNA-seq experiments with TopHat and Cufflinks. *Nat. Protoc.* **7**, 562–578.
- Ulianov, S.V., Khrameeva, E.E., Gavrilov, A.A., Flyamer, I.M., Kos, P., Mikhaleva, E.A., Penin, A.A., Logacheva, M.D., Imakaev, M.V., Chertovich, A., et al. (2016). Active chromatin and transcription play a key role in chromosome partitioning into topologically associating domains. *Genome Res.* **26**, 70–84.
- Venkatesh, S., Smolle, M., Li, H., Gogol, M.M., Saint, M., Kumar, S., Natarajan, K., and Workman, J.L. (2012). Set2 methylation of histone H3 lysine 36 suppresses histone exchange on transcribed genes. *Nature* **489**, 452–455.
- Wen, H., Li, Y., Xi, Y., Jiang, S., Stratton, S., Peng, D., Tanaka, K., Ren, Y., Xia, Z., Wu, J., et al. (2014). ZMYND11 links histone H3.3K36me3 to transcription elongation and tumour suppression. *Nature* **508**, 263–268.
- Xia, Z., Donehower, L.A., Cooper, T.A., Neilson, J.R., Wheeler, D.A., Wagner, E.J., and Li, W. (2014). Dynamic analyses of alternative polyadenylation from RNA-seq reveal a 3'-UTR landscape across seven tumour types. *Nat. Commun.* **5**, 5274.

- Xie, L., Pelz, C., Wang, W., Bashar, A., Varlamova, O., Shadle, S., and Impey, S. (2011). KDM5B regulates embryonic stem cell self-renewal and represses cryptic intragenic transcription. *EMBO J.* 30, 1473–1484.
- Yuan, W., Xu, M., Huang, C., Liu, N., Chen, S., and Zhu, B. (2011). H3K36 methylation antagonizes PRC2-mediated H3K27 methylation. *J. Biol. Chem.* 286, 7983–7989.
- Zhang, X., Huang, Y., and Shi, X. (2015). Emerging roles of lysine methylation on non-histone proteins. *Cell. Mol. Life Sci. CMLS* 72, 4257–4272.

## Figures

### Figure 1: Strategy for interrogating the transcriptomic life cycle of H3K36R animals.

A) Schematic of experimental high-throughput sequencing methods applied to H3K36R animals. Twelve tandem copies of the histone repeat unit were cloned into a custom BAC vector and site-specifically integrated into the *D. melanogaster* genome as described in McKay *et. al.* (2015). Poly-A-selected RNA was sequenced from whole 3<sup>rd</sup> instar larvae, ATAC-seq and rRNA-depleted nuclear RNA-seq were carried out from nuclei isolated from 3<sup>rd</sup> instar larvae, and short, nascent, capped RNAs were selected from nuclei and subjected to “Start-seq” (Henriques *et. al.* 2013).

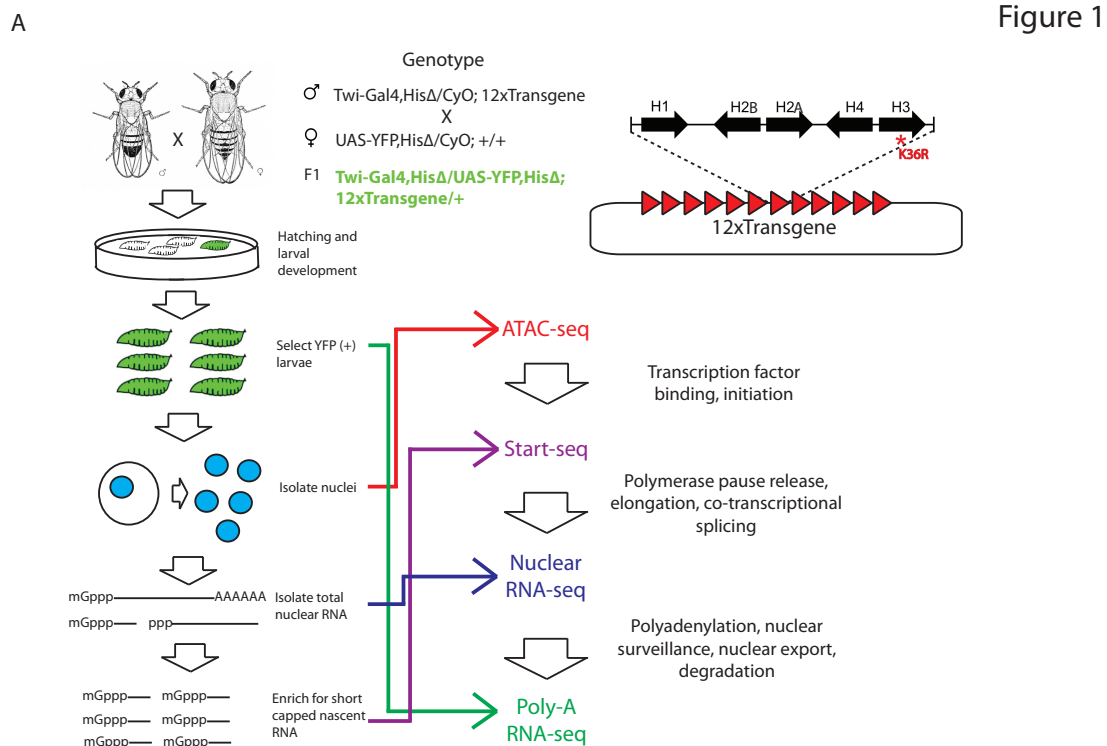

**Figure 2: Transcriptome dysregulation in H3K36R mutants is correlated with H3K36me3 ChIP-seq.** A) Metagene plot describing the density of H3K36me3 (top), H3K36me2 (middle), and H3K36me1 (bottom) ChIP-seq across genes that are upregulated (purple), unchanged (blue), or downregulated (yellow) in H3K36R mutants as compared with HWT controls. B) Boxplot of differential expression of gene cohorts stratified by density of H3K36me3 signal in the 3' UTR (1=lowest density decile, 10=highest decile). C) MA plot with accompanying LOESS regression line plotting log2 fold change (y-axis) vs. HWT FPKM (x-axis) interpreted from poly-A RNA-seq data.

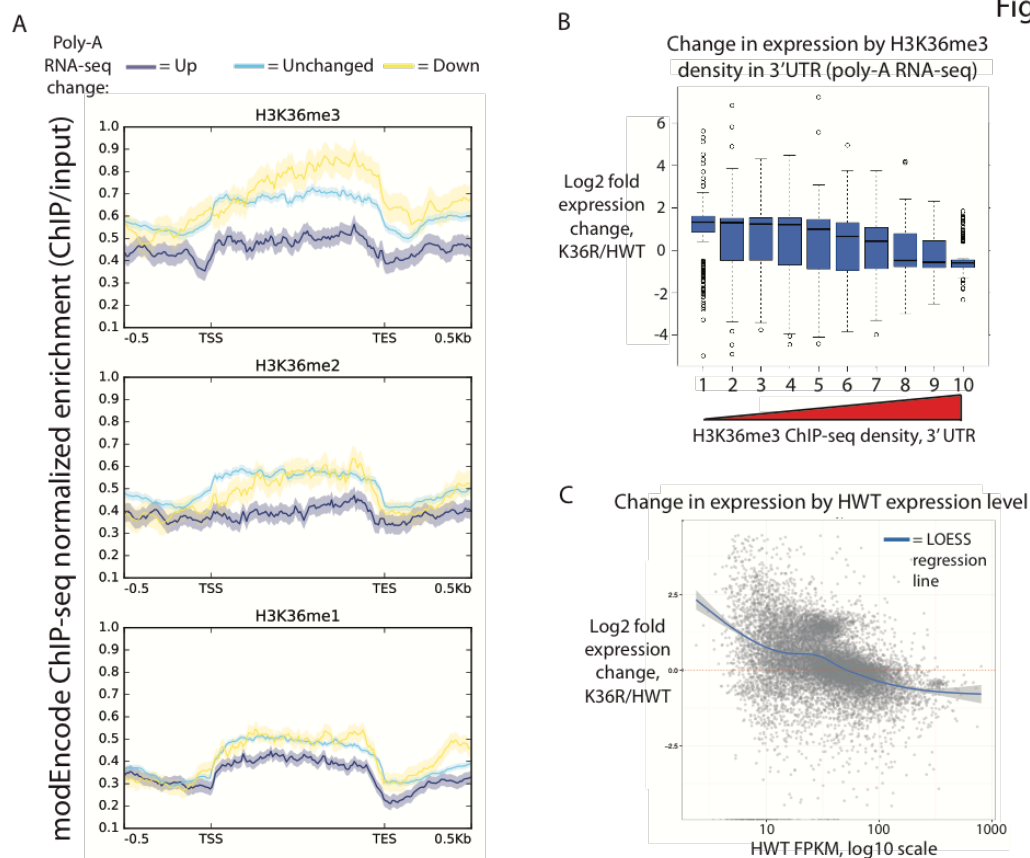

**Figure 3: H4 acetylation enrichment in mutants does not result in open-chromatin-dependent changes in gene expression.** A) Western blots measuring enrichment of histone H3, H3K36me3, H3K27me3, and pan H4 acetylation (H4ac) in H3K36R mutants and HWT controls. Signal relative to first lane is denoted below each band. B) Scatterplot of ATAC-seq signal mapping in a 200 nt window (as denoted at top) around obsTSSs, with  $R^2$  value indicated. C) Scatterplot of log2 fold change of poly-A RNA-seq (x-axis) vs. that of ATAC-seq (y-axis) signal in a window around the corresponding gene's transcription start site (as identified by start-seq). Genes with codirectional, statistically significant changes in both RNA-seq and ATAC-seq are indicated in red. Example browser shot of a gene differentially expressed in mutants in the absence of changes in chromatin accessibility at its start site is shown at right.

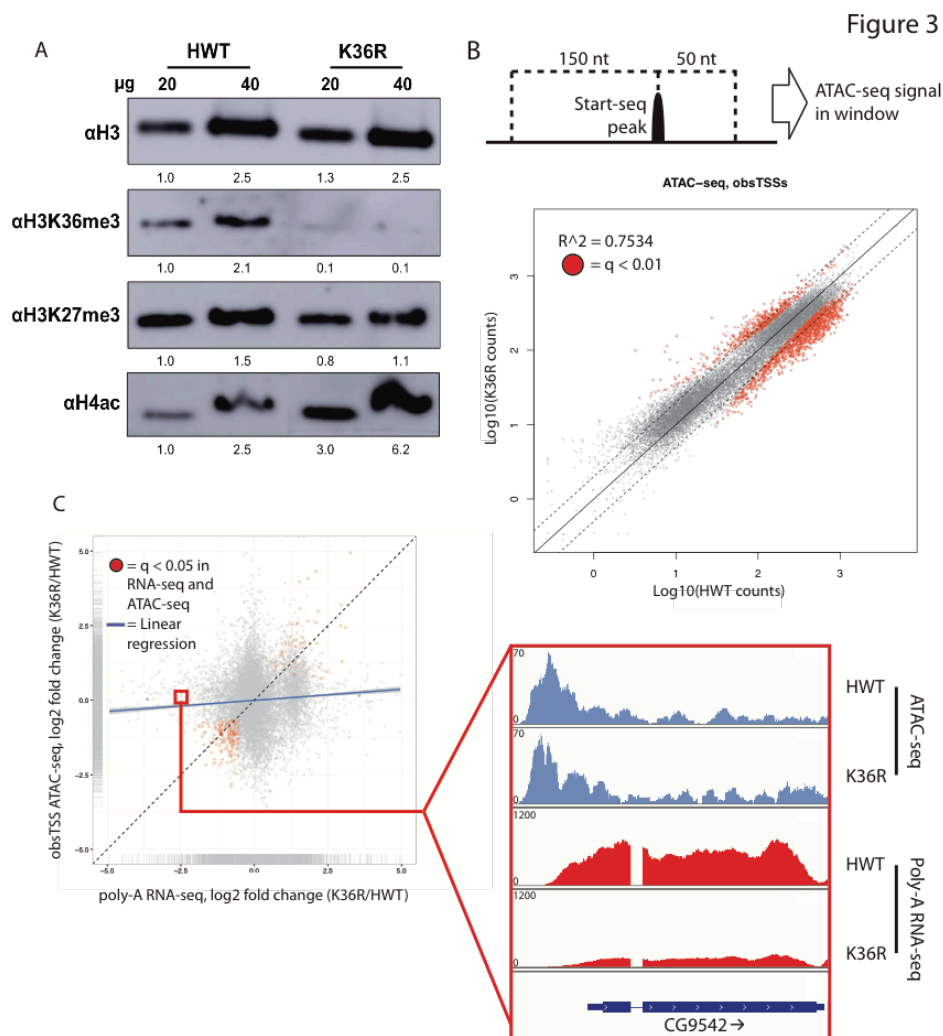

**Figure 4: H3K36 modification does not suppress cryptic transcription initiation in coding regions.** A) Representative browser shot of gene containing novel unannotated transcription start sites (nuTSSs, highlighted in red). Direction of transcription denoted by arrow, and read counts denoted on Y-axis. B) Boxplot describing the fold change in Start-seq signal for nuTSSs classified by their genomic localization and strand of origin relative to the resident gene if applicable. Lower boxplot describes H3K36me3 ChIP-seq signal (ChIP/input) for the same gene cohorts. C) Scatterplot of normalized nuclear RNA-seq reads mapping antisense to genes in the dm3 reference gene model in HWT (x-axis) or K36R (y-axis). Genes containing or within 1kb of a local H3K36me3-ChIP-seq peak are denoted by red dots. D) Hex-plot heatmap plotting nuTSSs by their location relative to the gene boundaries of the nearest gene, and the absolute change in their Start-seq signal (K36R – HWT).

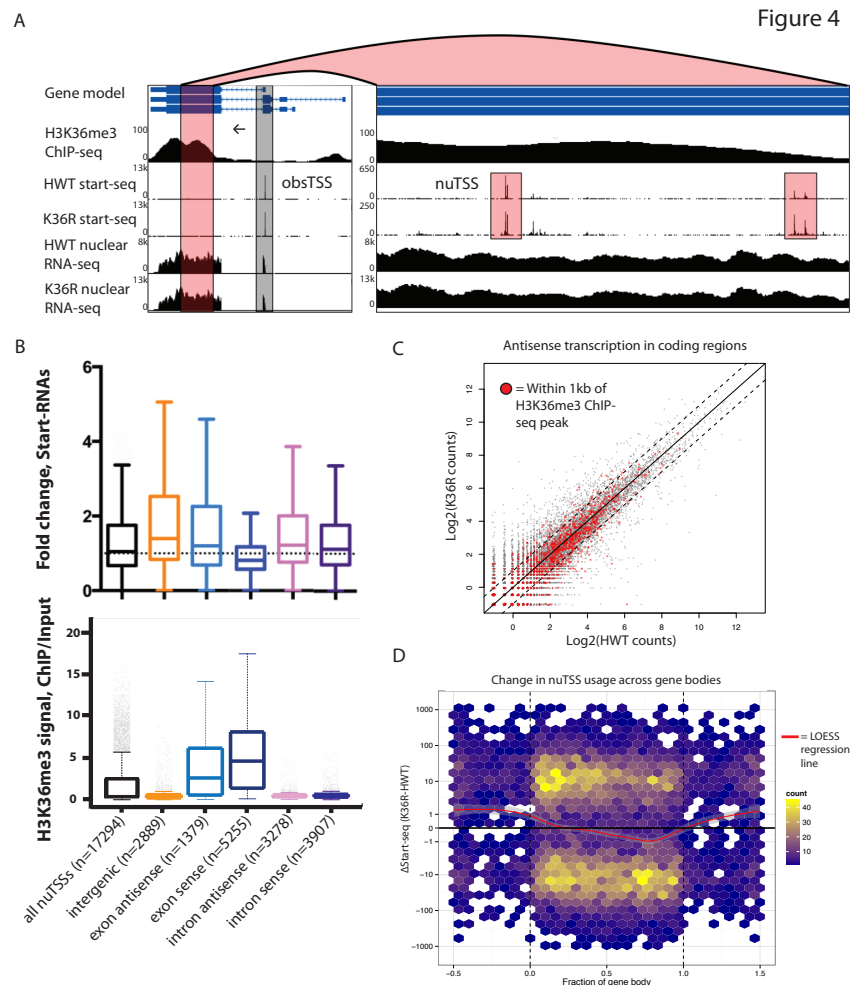

**Figure 5: H3K36 modification does not regulate alternative splicing.** A) Density plots reflecting the distributions of change in percent spliced in ( $\Delta$ PSI) values for skipped exon (red) or retained intron (blue) alternative splicing events manually classified as significant based on MISO parameters (see Methods). B) Volcano plots for skipped exon (left) and retained intron (right) events, with a local regression line (blue line) reflecting the skew in  $\Delta$ PSI values (x-axis) based on Bayes factor (y-axis). C) Global analysis of splice junction usage, where R denotes the “retention ratio” in one condition, and  $\Delta$ R denotes the difference in R between K36R and HWT.

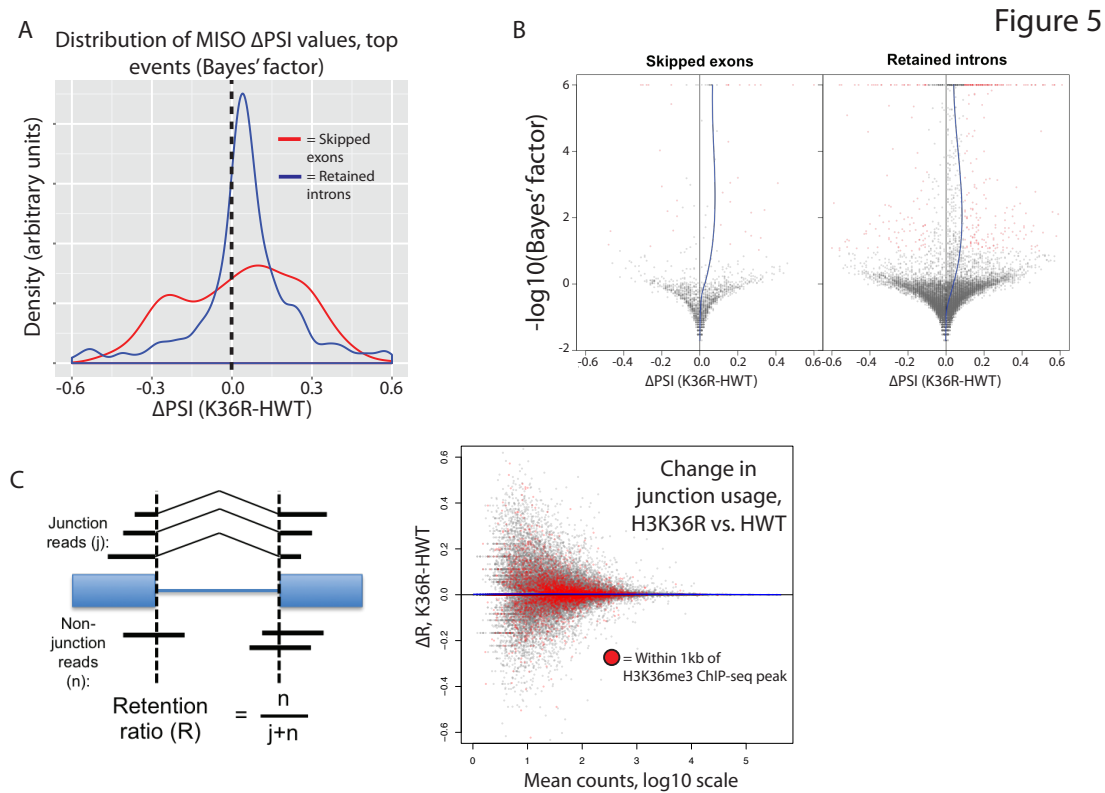

**Figure 6: A class of highly expressed genes is subject to exonuclease degradation and inefficient post-transcriptional processing in H3K36R mutants.** A) LOESS regression lines generated from MA plots of either nuclear or poly-A RNA-seq, plotting gene log2 fold change (y-axis) vs. normalized read counts in HWT (x-axis). B) Log2 fold change values between K36R and HWT in nuclear (left) and poly-A (right) RNA-seq, plotted for genes selected for further RT-PCR analysis. C) RT-qPCR quantification of differential expression between HWT and K36R for select genes in a no RNAi, *pacman* RNAi, *twin* RNAi, or *Pop2* RNAi background, using the  $-\Delta\Delta C_t$  method. D) LM-PAT assay results for the YFP transcript in HWT and K36R, in a no RNAi, *pcm* RNAi, *twin* RNAi, or *Pop2* RNAi background. Sanger sequencing trace confirming the poly-A site (leftmost panel) and differential tail lengths (right two panels) is shown below.

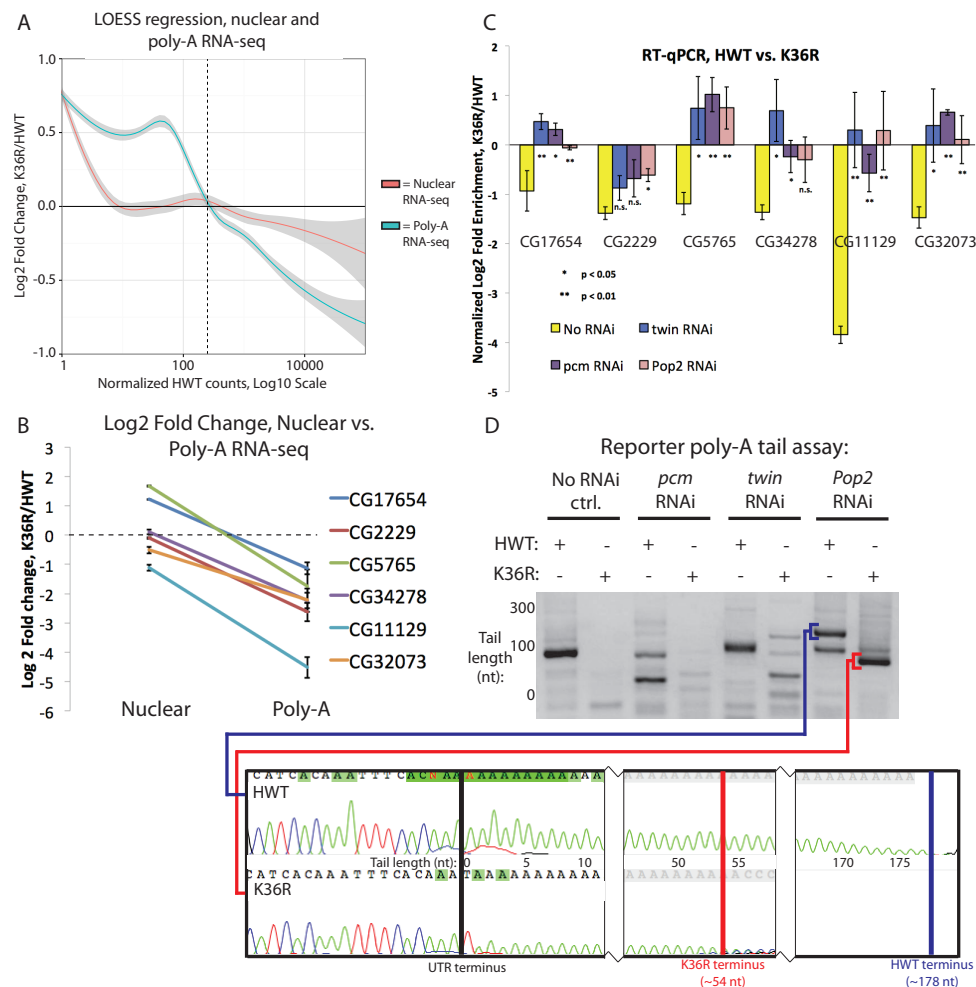



## Figure Supplements

**Figure 2-Supplement 1:** A) Boxplot depicting log<sub>2</sub> fold expression change for genes whose start sites reside in each of the nine different chromatin states defined in Kharchenko *et. al.* 2011. B) Histogram of mean FPKM for genes significantly upregulated (blue) or downregulated (red) in K36R animals ( $p < 0.05$ ). C) Left: Boxplot of comparison of estimated cell content from five 3<sup>rd</sup> instar larvae between HWT and K36R, based on normalizing by either quantitated RNA (left) or band intensity from histone H3 western blot signal (right). Given that K36R larvae are expected to have higher cell content based on histone normalization, total RNA per cell is likely overestimated in K36R, and therefore log<sub>2</sub> fold change gene expression values are not expected to be overestimated based on bias from higher RNA per cell in K36R. Right: This interpretation is confirmed by lower log<sub>2</sub> fold expression change in histone- vs. RNA-normalized RT-qPCR for select differentially expressed genes.

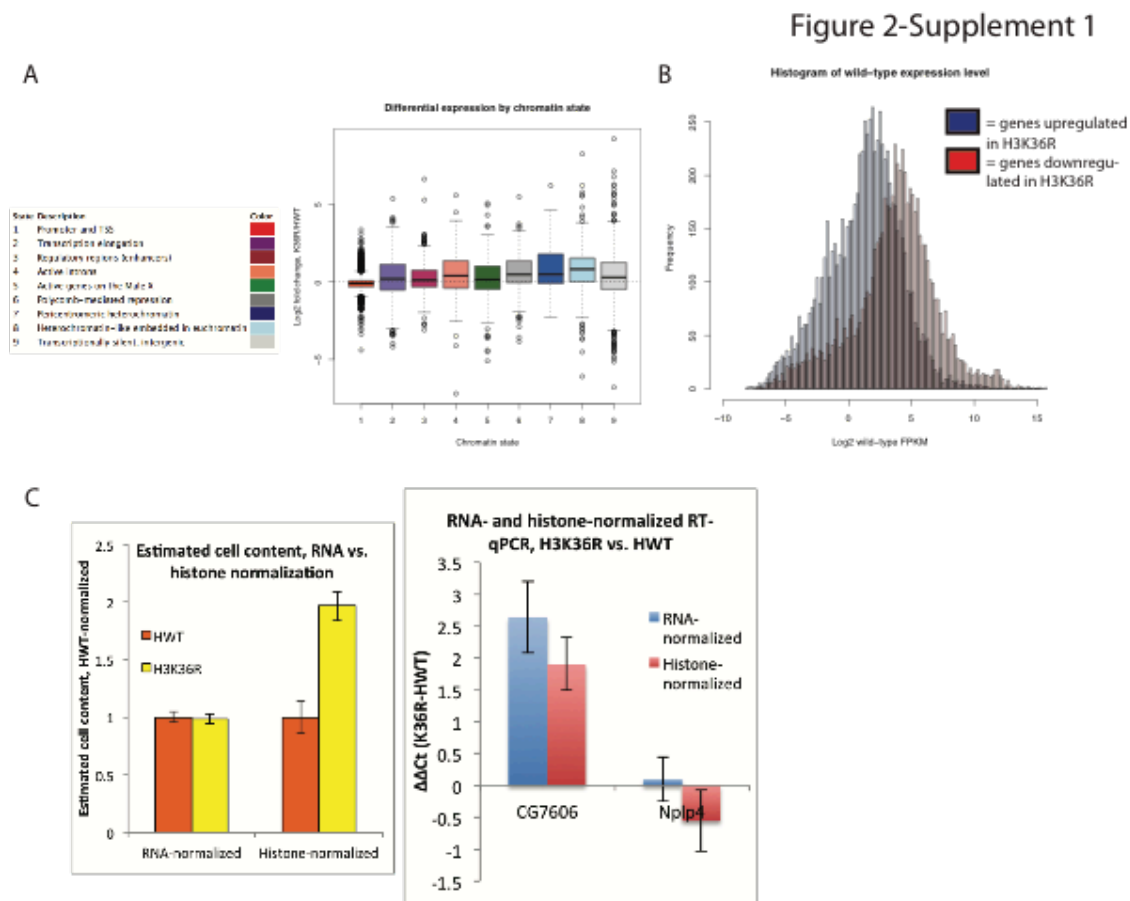

**Figure 3-Supplement 1:** A) Barplot displaying the fold change in western blot signal intensity quantified from two biological replicates of whole larval nuclear lysate for the antibodies indicated. Asterisk indicates T-test p-value between H3 and indicated PTM is  $< 0.05$ . B) Boxplot of normalized poly-A RNA-seq counts mapping to genes that co-occur with a strong polycomb regulatory region (Schwartz *et al.* 2006) in HWT and K36R. C) Polytene chromosome salivary gland squash and immunofluorescent stain for H4K12ac from HWT and K36R 3<sup>rd</sup> instar larvae. H4K12ac-bright (yellow arrowheads), and transcriptionally silent DAPI bright (orange arrowheads) regions, are anticorrelated in both genotypes, suggesting H4K12ac accumulates to transcriptionally active regions in K36R mutants D) Boxplot of differential expression of gene cohorts stratified by density of H4K16ac ChIP-seq signal in a 400 nt window surrounding the annotated gene start site (1=lowest density decile, 10=highest decile).

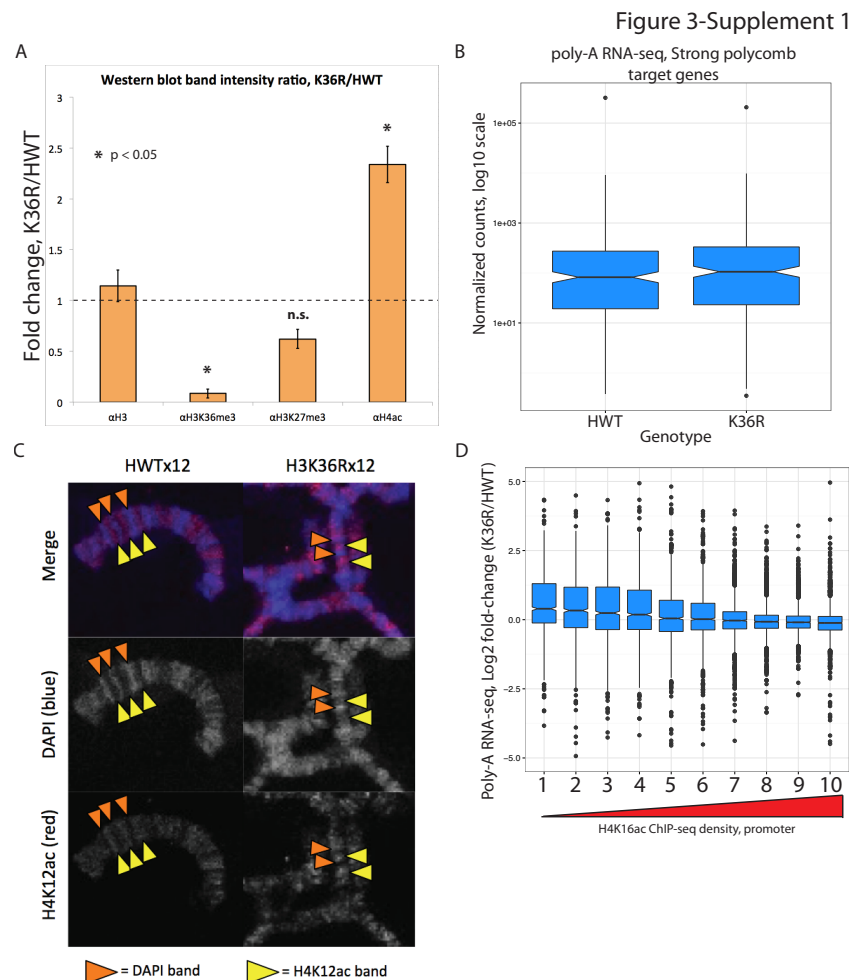

**Figure 3-Supplement 2:** A) Metaplot of Start-seq signal aligned in a 100 nt window around all annotated TSSs in the dm3 reference gene model. B) Metaplot of HWT and K36R nuclear RNA-seq signal aligned in a 1 kb window around all obsTSSs identified in Start-seq data. C) Representative browser shot of Start-seq signal pileup at annotated gene promoter (obsTSS). Direction of transcription denoted by arrow. D) Metaplot of ATAC-seq signal in a 4kb window surrounding obsTSSs identified by Start-seq. obsTSSs are binned by the average normalized signal across the window (denoted in the legend).

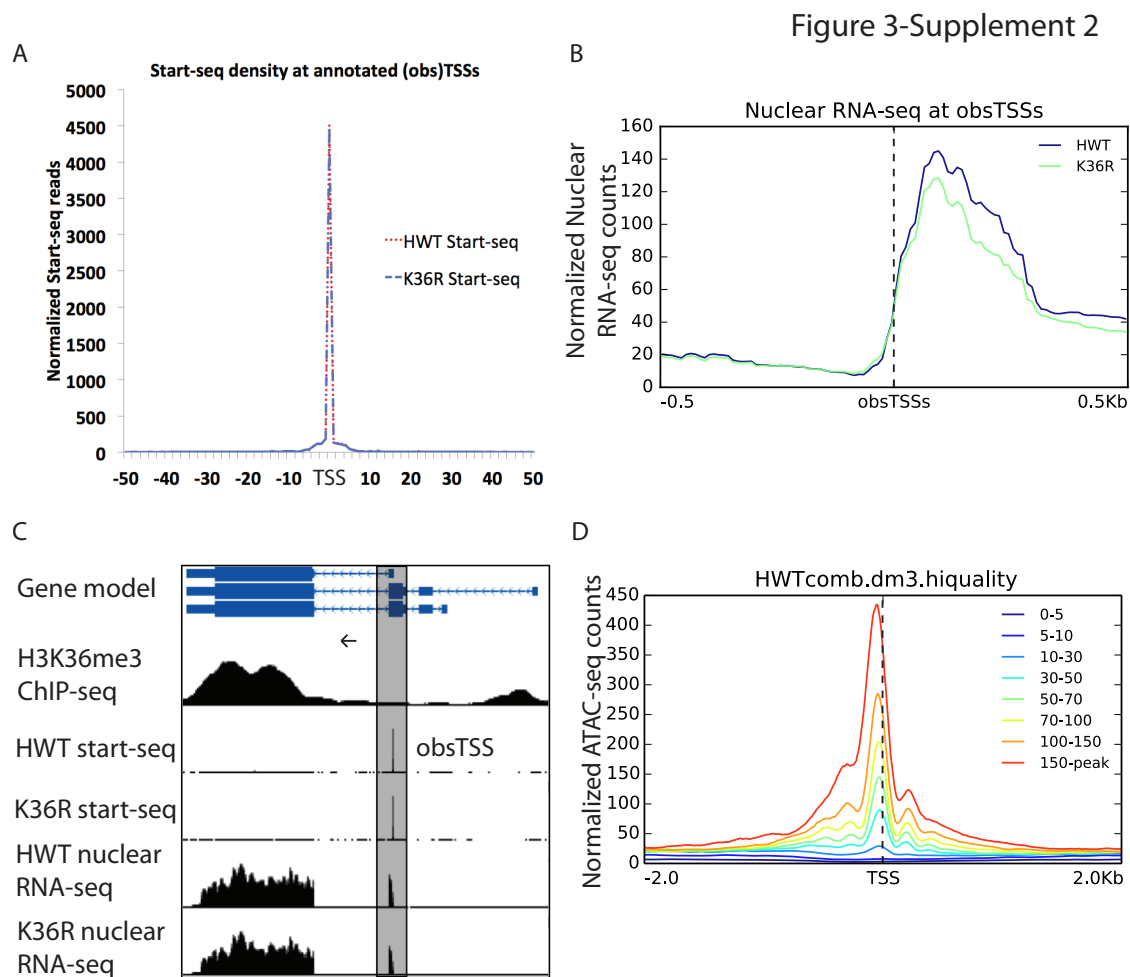

**Figure 4-Supplement 1:** A) Metaplot of ATAC-seq signal mapping in a 1 kb window around nuTSSs, classified as in Figure 4B. B) Metaplots of H3 (left) and H3K36me3 (right) ChIP-seq signal mapping to a 4 kb window around nuTSSs, separated by quartiles of absolute Start-seq signal change between K36R and HWT. C) Metaplots of HWT ATAC-seq signal mapping to a 4 kb window around nuTSSs, separated by log2 fold change in Start-seq signal. “Up” denoted increased by more than two fold in K36R, “Down” denotes decreased by more than two fold in K36R, and “Unchanged” denotes all other nuTSSs. D) Heatmaps displaying H3 (left) and H3K36me3 (right) ChIP-seq signal mapping to a 4 kb window around nuTSSs representing the categories listed in B. E) Heatmaps displaying H3 (left) and H3K36me3 (right) ChIP-seq signal mapping to a 4 kb window around nuTSSs representing the categories listed in C.

Figure 4-Supplement 1

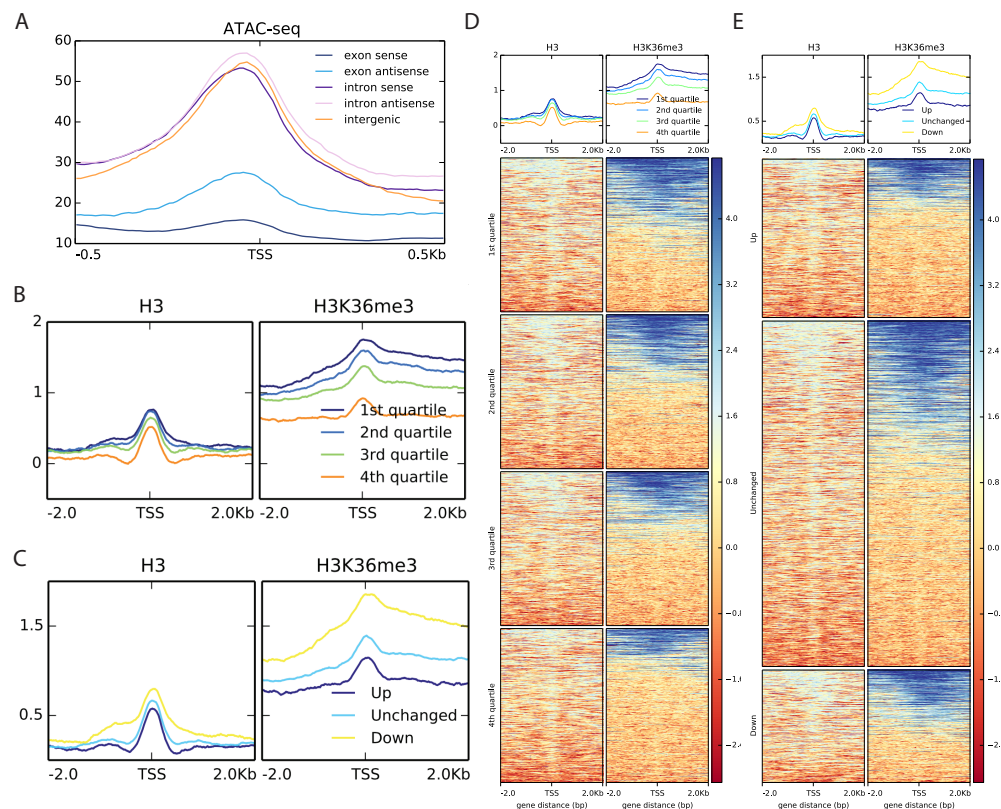

**Figure 6-Supplement 1:** A) RT-PCR for select genes from cytoplasmic (lanes 1 and 2) or nuclear (lanes 3 and 4) RNA from HWT (lanes 1 and 3) or K36R (lanes 2 and 4) animals. 7SK RNA is a control for nuclear enrichment. B) RT-qPCR for select genes from Figure 6B measuring normalized Log2 fold change (HWT/K36R) in no RNAi or *Dcp2* RNAi background. P-value obtained via t-test. C) Schematic of modified LM-PAT assay, in which an adenylated oligonucleotide anchor is ligated to the 3' end of total RNA, cDNA is generated using an anchor-specific RT primer, and genes of interest are amplified using a gene-specific forward primer and an anchor specific reverse primer that contains either an oligo-T sequence at its 3' end (tail-anchored) so as to extend from the ends of poly-A tails, or an oligo-T-N sequence (UTR-anchored) in order to extend from the terminus of the 3' UTR. D) RT-qPCR for YFP measuring normalized Log2 fold change (HWT/K36R) in no RNAi, *pcm* RNAi, or *twin* RNAi backgrounds. P-value obtained via t-test. E) Genome wide analysis of alternative polyadenylation using DaPars (Xia *et. al.* 2014), with percentage of distal poly-A site usage (PDUI) for each gene in HWT and K36R plotted on the x- and y-axes, respectively.

Figure 6-Supplement 1

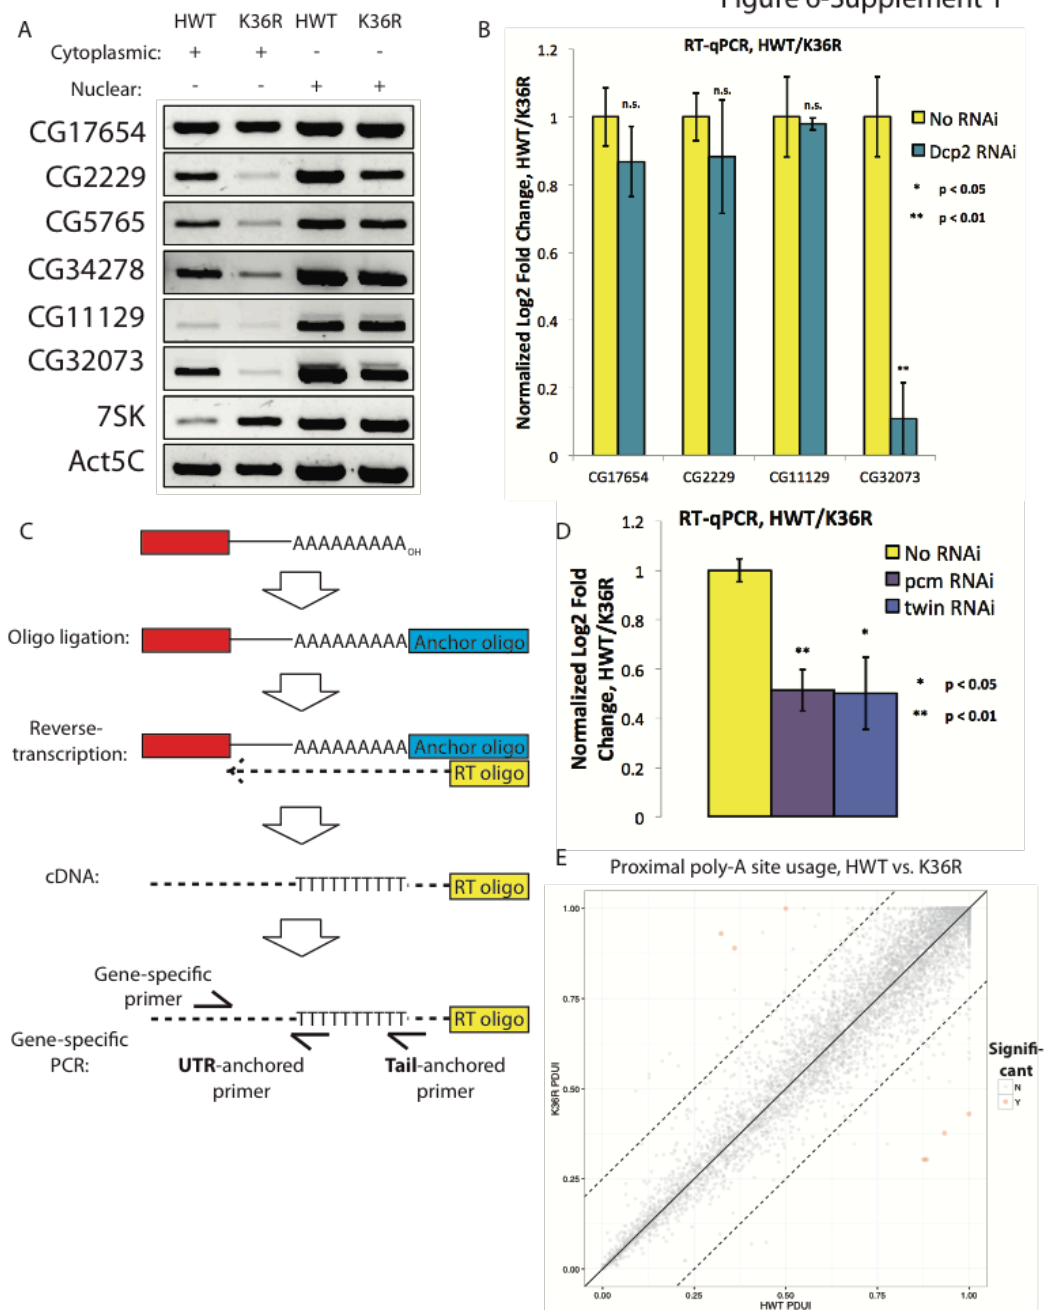

Source: http://biorxiv.org/content/10.1101/114926v1.full.pdf
